# Supplementary material for: Exploring immunotherapy efficacy in non-small cell lung cancer patients with BRAF mutations: a case series and literature review
Source: PubMed Central journal article supplement — Transl Lung Cancer Res. 2024 Oct 25;13(10):2491–9. doi: 10.21037/tlcr-24-253 (PMC11535819; doi:10.21037/tlcr-24-253), 2024-10-25
Supplement: tlcr-13-10-2491-dss.pdf [file tlcr-13-10-2491-dss.pdf]

## Data Sharing Statement

|                     |                                                                                                                                                    |                                                                                                                  |
|---------------------|----------------------------------------------------------------------------------------------------------------------------------------------------|------------------------------------------------------------------------------------------------------------------|
| <b>Article Info</b> | https://dx.doi.org/10.21037/tlcr-24-253                                                                                                            |                                                                                                                  |
| <b>Item</b>         | <b>Question</b>                                                                                                                                    | <b>Authors' Response<br/>( place "-" if not applicable )</b>                                                     |
| 1                   | Would you like to share data collected for your study to others?                                                                                   | Yes                                                                                                              |
| 2                   | If not, would you like to share the reason for your decision?                                                                                      | -                                                                                                                |
| 3                   | What data in particular will be shared?                                                                                                            | All presented in the manuscript if requested.                                                                    |
| 4                   | Any other documents will be share? Such as study protocol, statistical analysis plan, informed consent form, clinical study report, analytic code. | To be discuss on each request.                                                                                   |
| 5                   | When will data availability begin?                                                                                                                 | From the date of publication                                                                                     |
| 6                   | When will data availability end?                                                                                                                   | Two years within the publication date, since the technique or survival date may be updated over time.            |
| 7                   | To whom will you share the data?                                                                                                                   | Academics, medical oncologist on individual request.                                                             |
| 8                   | For what type of analysis or purpose?                                                                                                              | Immunological studies.                                                                                           |
| 9                   | How or where can the data/documents be obtained?                                                                                                   | E-mail: <a href="mailto:IzabelaChmielewska@umlub.pl">IzabelaChmielewska@umlub.pl</a>                             |
| 10                  | Any other restrictions?                                                                                                                            | We may balance the potential benefits and risks for each request and then provide the data that could be shared. |
